# Supplementary material
Source: PubMed Central journal article supplement (PMC7467562)
Supplement: am0c09166_si_001.pdf [file am0c09166_si_001.pdf]

1 [Supporting information]

2

3 **Adhesion of Epithelial Cells to PNIPAm Treated Surfaces for Temperature-Controlled**

4 **Cell Sheet Harvesting**

5

6 Hyejeong Kim<sup>1</sup>, Hannes Witt<sup>1</sup>, Tabea A. Oswald<sup>2</sup>, Marco Tarantola<sup>1,3\*</sup>

7 **Corresponding Author:**

8 Dr. Marco Tarantola, e-mail: Marco.Tarantola@ds.mpg.de, phone: +49-551-5176-316

9

10 <sup>1</sup> Max Planck Institute for Dynamics and Self Organization (MPIDS), Am Fassberg 17, 37077  
11 Göttingen, Germany

12

13 <sup>2</sup> Institute of Organic and Biomolecular Chemistry, Georg August Universität Göttingen,  
14 Tammannstrasse 2, 37077 Göttingen, Germany

15 <sup>3</sup> Institute for Dynamics of Complex Systems, University of Göttingen, Friedrich-Hund Platz  
16 1, 37073 Göttingen, Germany

17 **Contents**

18 **Figure S1.** Optical images of PMS and bare gold surface

19 **Figure S2.** Qi-mode-imaging based 2D topology of microgels at 28 °C and 45 °C

20 **Figure S3.** Confocal images of fixated MDCK II cell sheet on gold substrate after 48 h

21 **Figure S4.** Contact angle measurement on the gold surface PMS and PMS with remaining  
22 ECM after cell sheet lift-off.

23 **Figure S5.** Bright field images while conducting SCFS.

24 **Figure S6.** Representative F-D curves of SCFS

25 **Chapter S1.** Early cell-cell adhesion on PMS upon temperature changes monitored via SCFS

26 **Figure S7.** Cell-cell adhesion on bare gold and PMS upon temperature changes monitored via  
27 SCFS.

28 **Figure S8.** Histogram of the probability distribution of slopes of each step

29 **Table S1.**  $F_{\max}$ ,  $W_{\text{adh}}$ ,  $F_{\text{step}}$ , step slope,  $l_{\text{step}}$ ,  $N_{\text{step}}$  and  $l_{\text{pulling}}$  for SCFS

30 **Table S2.** Number of F-D curves for step slope analysis

31 **Figure S9.** Ratio of jump steps to tether steps of MDCK II cells

32 **Table S3.** Correlation matrix for number of jump steps and tether steps

33 **Figure S10.** Average number of jump steps and tether steps of MDCK II cells

34 **Table S4.** Average number of jump and tether step in single F-D curve.

35 **Figure S11.** Confocal images of MDCK II cell sheet culture on the gold substrate

36 **Figure S12.** Cell morphology at the early stage (6h) of incubation

37 **Figure S13.** Results of SCFS with all results of significance tests.

38 **Figure S14.** Interaction between ECM components and gold or PMS upon temperature  
39 switching

40 **Figure S15.** F-D curves for the functionalized cantilevers

41 **Table S5.** Correlation matrix

42 **Table S6.** Number of measurement information of SCFS and CP-AFM

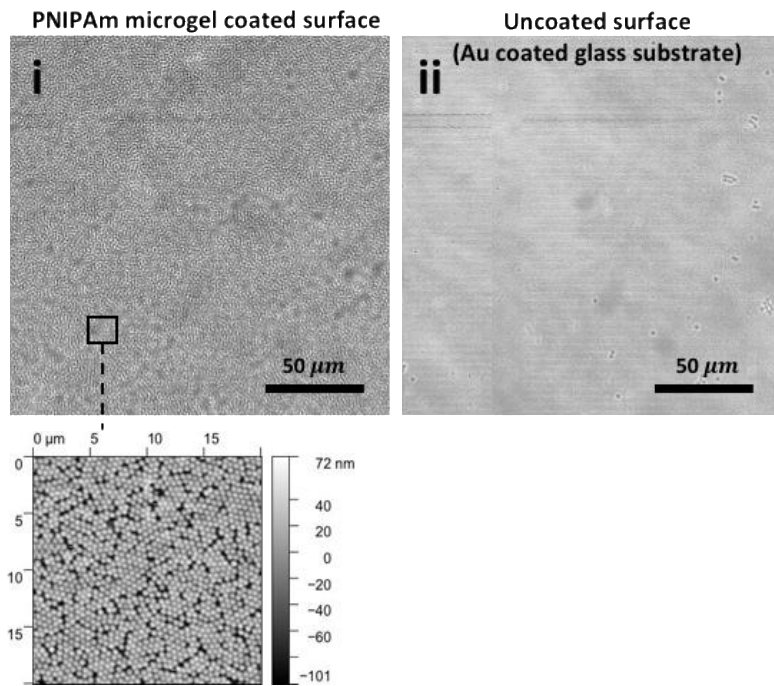

43  
 44  
 45  
 46  
 47  
 48

**Figure S1.** Optical images of i) PNIPAm microgel coated surface and ii) bare gold coated glass substrate, both recorded in bright field mode. Zoom-in (i) highlights the corresponding QI mode imaging area

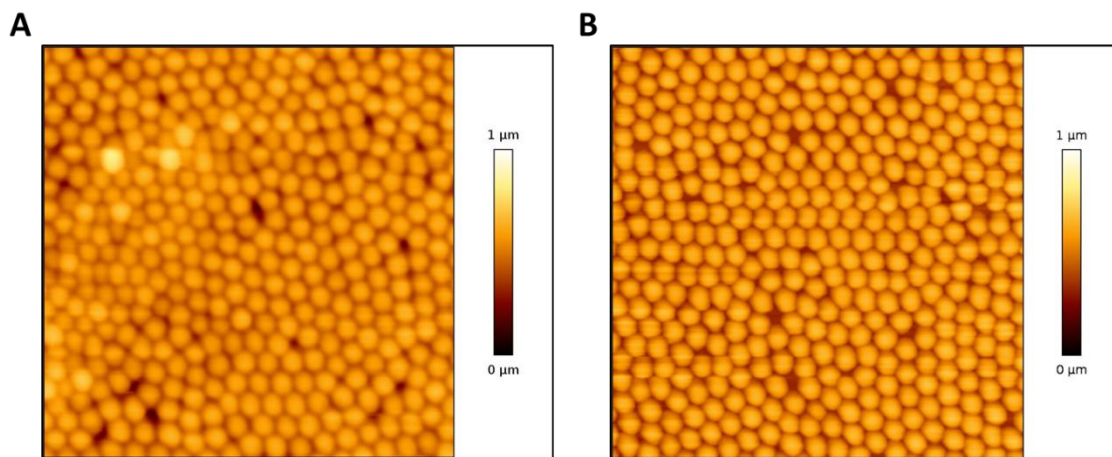

49  
50  
51  
52  
53

**Figure S2.** QI-mode-imaging based 2D topology of microgels at **A)** 28 °C, and **B)** 45 °C. 10 x 10 μm scan area.

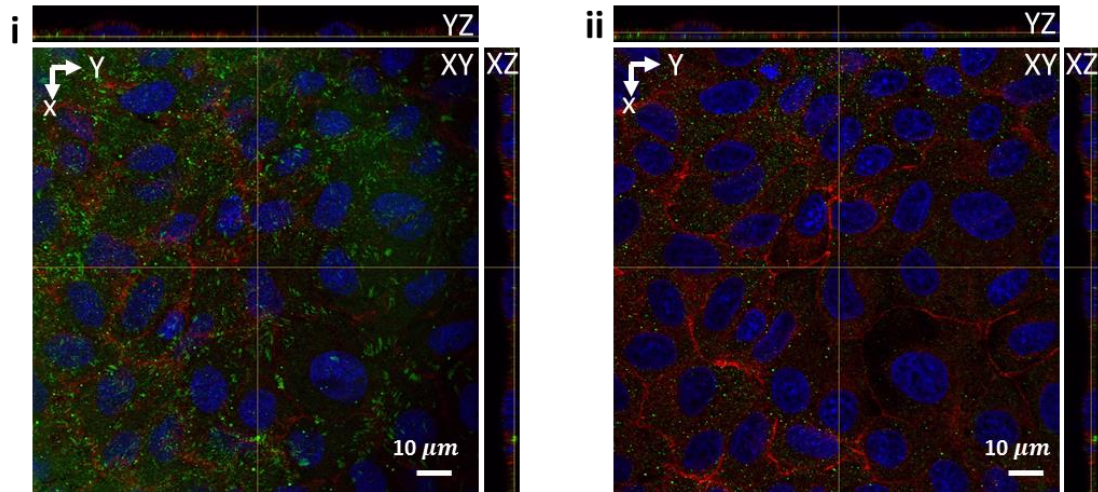

54  
55  
56  
57  
58  
59  
60

**Figure S3.** Confocal images of fixed MDCK II cell sheet stained for nuclear DNA (blue), paxillin (green) and E-cadherin (Red) on gold substrate after 48 h. i) Paxillin is well distributed on the ventral surface of the cell sheet at the surface-proximal focal plane. ii) E-cadherin is distributed between individual cells at the focal plane of the apical cell membrane height.

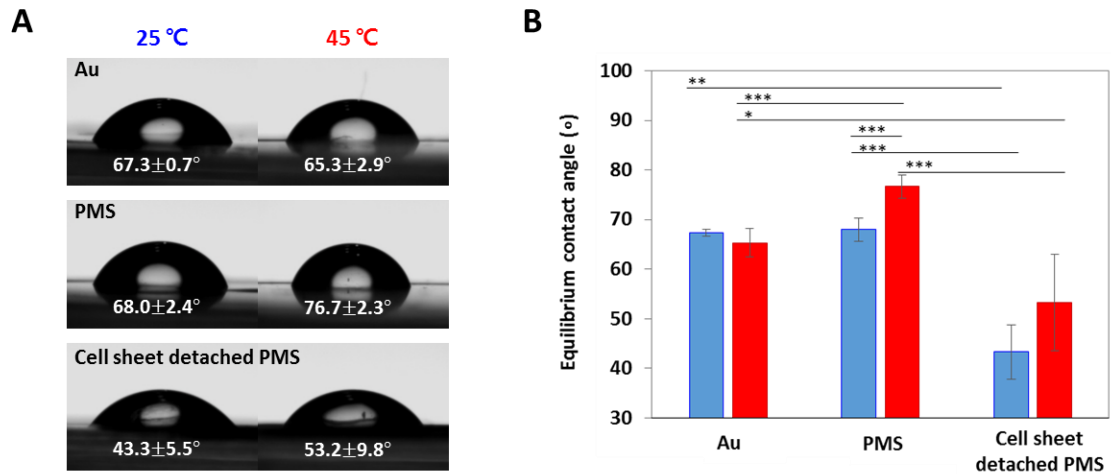

**C**

|                            | Au25 | Au45        | PMS25       | PMS45               | Cell sheet detached PMS 25 | Cell sheet detached PMS 45 |
|----------------------------|------|-------------|-------------|---------------------|----------------------------|----------------------------|
| Au25                       | -    | <b>0.42</b> | <b>0.57</b> | -                   | 0.018 (**)                 | -                          |
| Au45                       | -    | -           | -           | <b>0.015(**)</b>    | -                          | <b>0.07 *</b>              |
| PMS25                      | -    | -           | -           | <b>0.0003 (***)</b> | <b>0.0004 (***)</b>        | -                          |
| PMS45                      | -    | -           | -           | -                   | -                          | 0.0002 (***)               |
| Cell sheet detached PMS 25 | -    | -           | -           | -                   | -                          | <b>0.12</b>                |
| Cell sheet detached PMS 45 | -    | -           | -           | -                   | -                          | -                          |
| # measurement              | 3    | 3           | 7           | 7                   | 5                          | 5                          |

61  
62

63 **Figure S4.** Contact angle measurement on the gold surface PMS and PMS with remaining  
64 ECM after cell sheet lift-off. (A) Side view images of static droplets on the surfaces. (B)  
65 Equilibrium water contact angles of gold, PMS, and PMS after cell sheet peeling at different  
66 temperatures below (blue) and above (red) LCST. (C) Correlation matrix and number of  
67 independent test samples of contact angle measurements. (\*: p value < 0.1, \*\*: p value < 0.05,  
68 \*\*\*: p value < 0.01; bold: T-test, normal: Wilcoxon Rank Test)

69

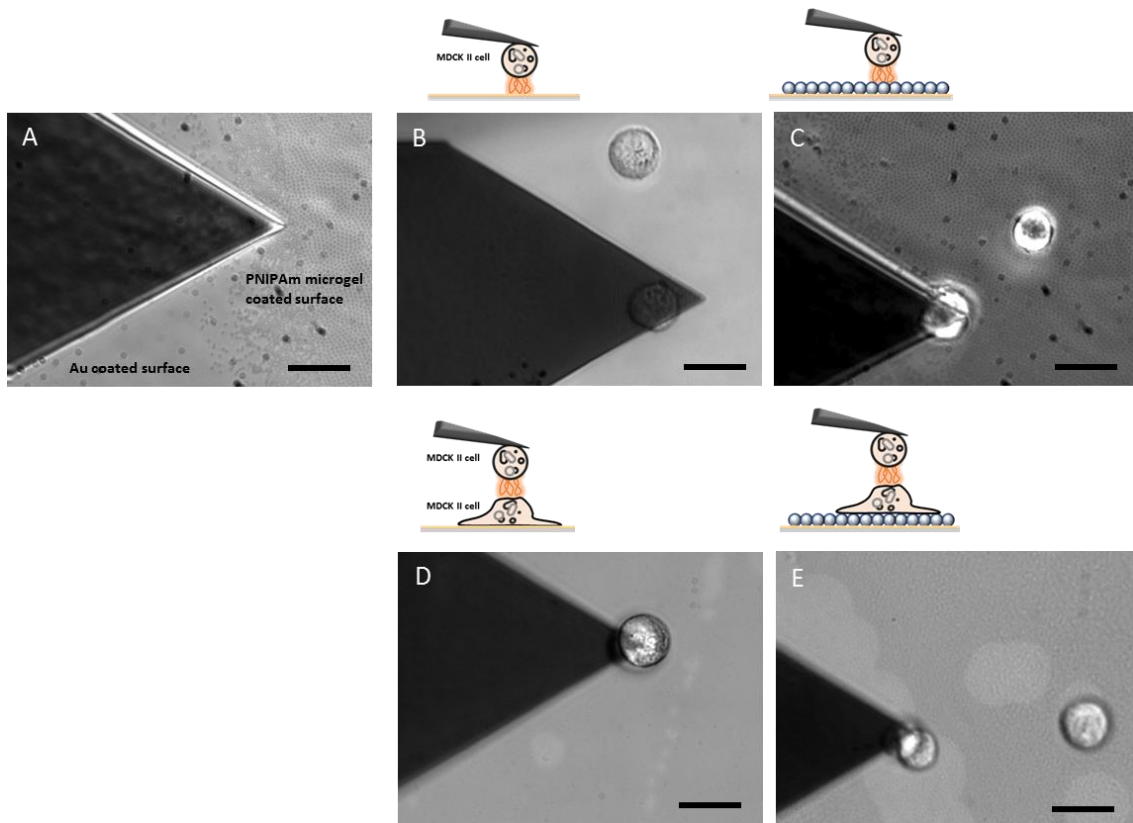

70  
 71  
 72  
 73  
 74  
 75  
 76  
 77  
 78  
 79

**Figure S5.** Bright field images while conducting SCFS. **A.** Cantilever tip and a petri dish coated with PNIPAm microgels on one half-side only. Cantilever tip with a single *MDCK II* cell while recording cell-substrate adhesion force curves (**B**) on gold substrate or (**C**) on PMS. Cantilever tip with a *MDCK II* cell while recording cell-cell adhesion force curves (**D**) on gold substrate or (**E**) on PMS. The *MDCK II* cells adhered on the cantilever tip are out of focus while the cell on the substrate or the polymer substrates are in focus. Scale bar: 20  $\mu\text{m}$ .

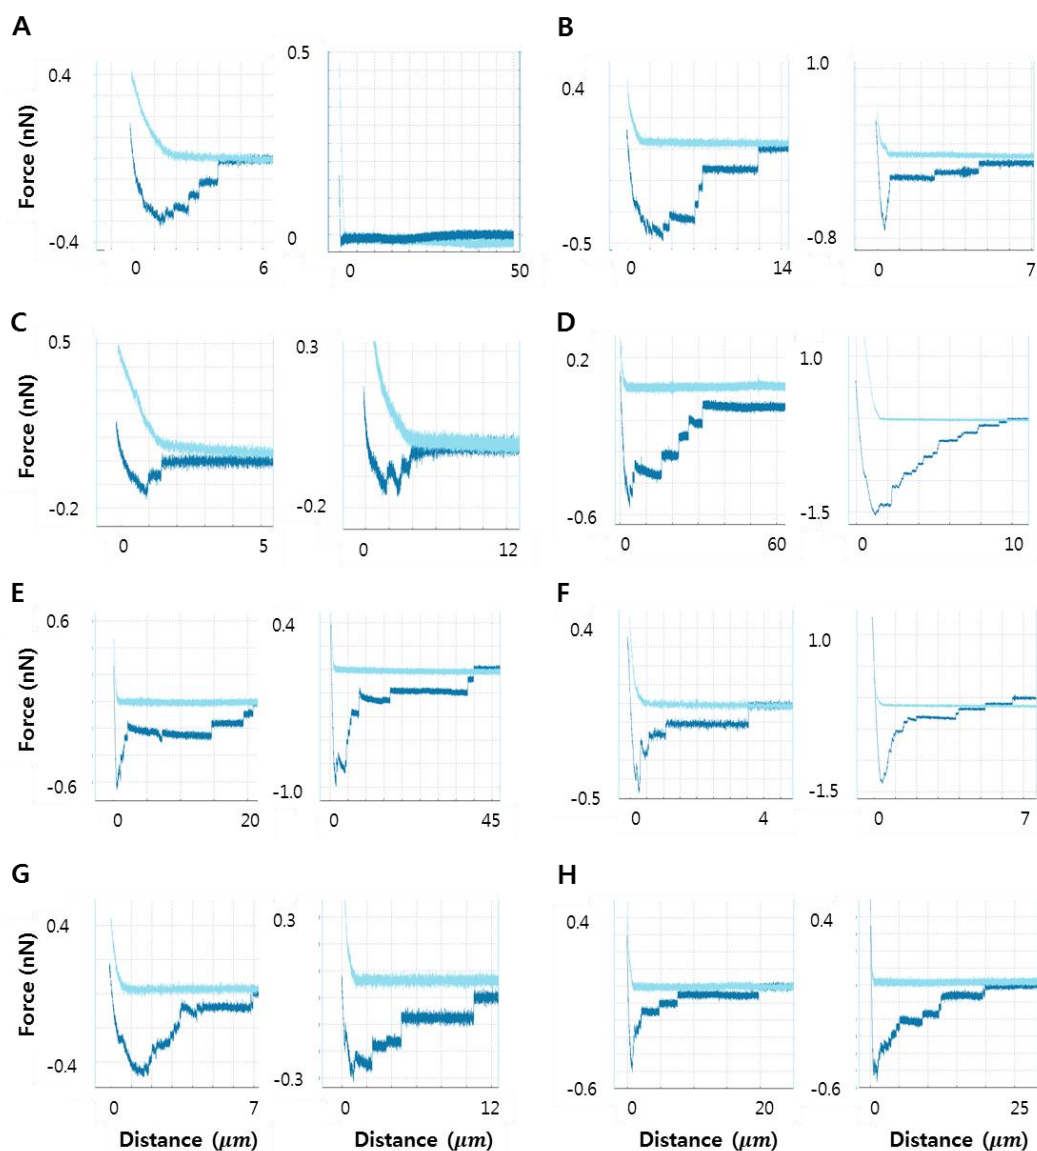

80  
 81  
 82 **Figure S6.** Representative F-D curves of SCFS for the cases of (A)ACC, (B)ACH, thus cell-  
 83 substrate interaction at low and high temperatures on gold (C)PCC, (D)PCH, thus cell-substrate  
 84 interaction at low and high temperatures on PMS (E)ACCC, (F)ACCH, thus cell-cell  
 85 interaction at low and high temperatures on gold (G)PCCC, and (H)PCCH, , cell-cell  
 86 interaction at low and high temperatures on PMS, the latter 4 categories at 90s dwell time, the  
 87 first at 30 s. Note that the dwell time in not plotted, thus upon contact, trace and retrace  
 88 sometimes don't overlap.

89

90 **Chapter S1.** Early cell-cell adhesion on PMS upon temperature changes monitored via SCFS

91 We expect for cell sheet removal that besides cell-substrate interaction also cell-cell adhesion  
92 is of uttermost relevance. We therefore next looked at the strength of initial cell-cell adhesion  
93 on PMS compared to gold substrate. While we still pick cells with the AFM cantilever as  
94 described above, we now search optically for cells adhering either to the gold substrate or PMS  
95 and bring the two cells into contact using SCFS for two time intervals, 30 s (Figure S13, center)  
96 as well as 90s as shown in Figure S7A. Here, ACCH/ACCC refers to cell - cell interactions on  
97 gold at heated/cooled states; PCCH/PCCC for cell-cell interactions on PMS at heated/ cooled  
98 state, respectively. For  $F_{\max}$ , significant effects are not detectable upon cooling for cell-cell  
99 contacts at both contact times, the forces we observe all lay between 100 to 2500 pN and are  
100 similar to the cell-substrate interaction. In terms of  $W_{\text{adh}}$  for cell-cell contact interaction on  
101 different substrates, 30 s contact times lead to an adhesion work significantly decreasing on  
102 gold upon temperature switching, but not on PMS (see figure S913 center). When looking at  
103 the increased contact times of 90 s (see figure S7 C), we now see a significant temperature-  
104 based reduction for both gold and PMS, with also significantly increased  $W_{\text{adh}}$  on PMS over  
105 gold at both temperatures. As mentioned above, for the cell-cell contact case,  $F_{\text{step}}$  between an  
106 epithelial cell at the cantilever and the cell attached to the substrate can relate to adherens  
107 junction formation typically based on cadherins.  $F_{\text{step}}$  significantly increases with decreasing  
108 temperatures for all substrates at 30 s, and also decreases on PMS for 90s, which was not  
109 observed for gold surfaces. (Figures S7D and S13E, center). As for the cell-substrate case,  
110 PMS is generally leading to higher  $F_{\text{step}}$ . For the parameter  $l_{\text{pulling}}$ ,  $l_{\text{step}}$ , and step number on gold  
111 and at 30 s, please refer to Figures. S13C, D and G, but the few temperature dependent changes  
112 are found on gold. The slopes of step events are summarized in Figure S7E and S13F: based  
113 on the temperature reduction, the slope on PMS increases at 90s and decreases at 30 s, which  
114 is the opposite of the situation found for  $F_{\text{step}}$ . Slopes on gold are not affected significantly.  
115 Regarding the absolute step number (Figure S7 F), on gold surface, temperature decrease  
116 induces fewer overall adhesion points between the cells and equal numbers of jumps and tethers.  
117 On PMS cases we also find a decrease of total number of adhesion spots between the cells, but  
118 less tether and therefore unspecific adhesion to the lower cell. The cells cultured on PMS thus  
119 form more tether junctions with cytoskeletal anchoring to the cantilever-adherent cells at lower  
120 temperature. The ratio of jump to tether steps - not including 30 s cell-cell contact cases - is  
121 shown in Figure S9B: upon cooling, only on PMS cell show more jumps, while on gold the  
122 ratio is reduced to an equal jump to tether probability. We can therefore summarize that a



123 temperature decrease on PMS substrates - as opposed to gold surfaces - increases  $F_{\text{step}}$  and  
 124 decreases the step slope at 30 s, while this situation inverts for 90 s, leading to induction of  
 125 jumps, thus similar to the cell-substrate case.

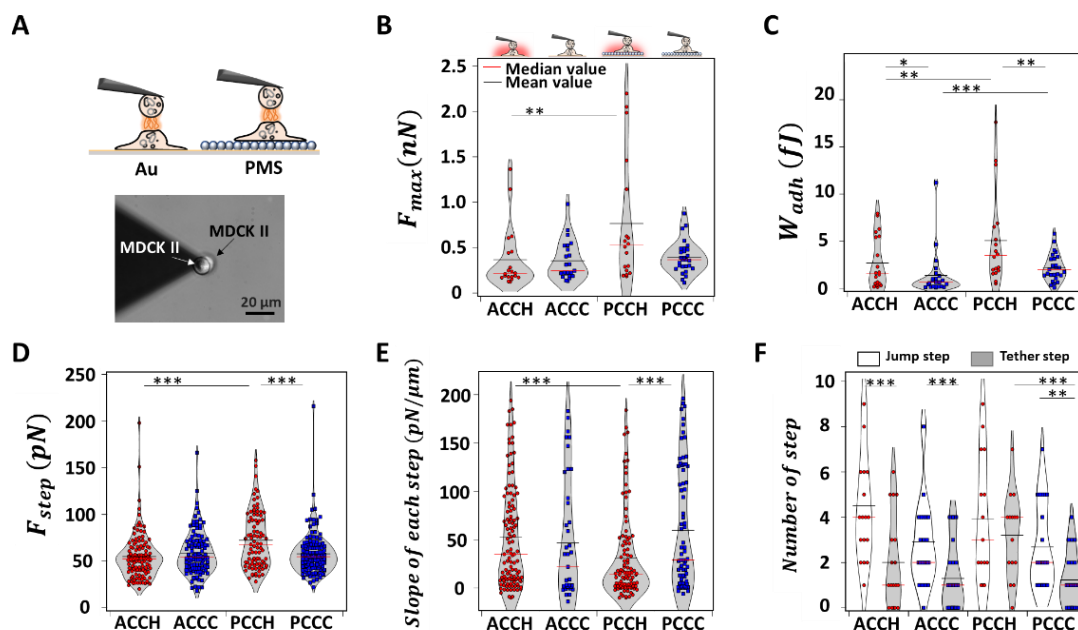

126  
 127 **Figure S7.** Cell-cell adhesion on bare gold and PMS upon temperature changes monitored via  
 128 SCFS. A. Schematic of AFM-based cell-cell adhesion experiments. A bright field image of the  
 129 cantilever tip with an attached single MDCK II cell and a second surface-attached cell while  
 130 recording cell-cell adhesion force curves.  $F_{\text{max}}$  (B),  $W_{\text{adh}}$  (C), step force  $F_{\text{step}}$  (D), step slope  
 131 (E) and ratio of jump steps to tether-like steps (F) of MDCK II cells on another MDCK II cell  
 132 cultured on gold substrates and PMS, all upon temperature switch, corresponding categories  
 133 schematically given at the top. (red line: median value; black line: mean value). ACCH/ACCC  
 134 for cell - cell interactions on gold at heated/cooled states; PCCH/PCCC for cell-cell interactions  
 135 on PMS at heated/ cooled state, respectively. Significance test only shown for temperature  
 136 changes, for all additional categories refer to Fig. S13 and Table. S6

137

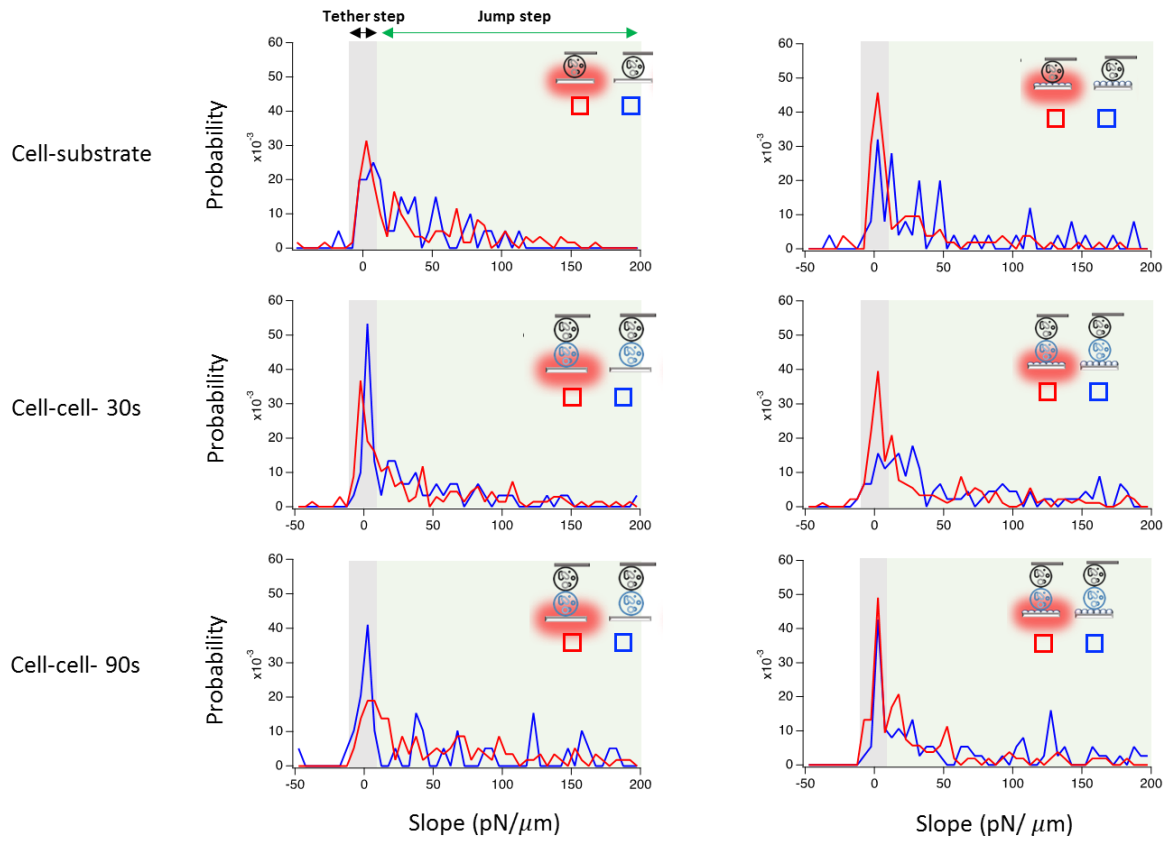

138  
 139 **Figure S8.** Histogram of the probability distribution of slopes of each step, corresponding to  
 140 figure 3 E and S7 E.

141

142 **Table S1.**  $F_{max}$ ,  $W_{adh}$ ,  $F_{step}$ , step slope,  $l_{step}$ ,  $N_{step}$  and  $l_{pulling}$  for SCFS base cell liftoff from PMS  
 143 and gold substrates and the cell liftoff from another cell cultured on PMS and gold substrates  
 144 above and below the LCST, given as mean (M), median (MD) and degree of change.

|               | ACCH30          | ACCC30 | PCCH30 | PCCC30 | ACCH90 | ACCC90 | PCCH90 | PCCC90 |       |
|---------------|-----------------|--------|--------|--------|--------|--------|--------|--------|-------|
| $F_{max}$     | Mean, M, (nN)   | 0.21   | 0.21   | 0.37   | 0.25   | 0.37   | 0.36   | 0.77   | 0.39  |
|               | M(C)/M(H) (%)   |        | 100    |        | 69     |        | 97     |        | 51    |
|               | SD (nN)         | 0.14   | 0.09   | 0.39   | 0.16   | 0.34   | 0.22   | 0.69   | 0.18  |
|               | Median, MD (nN) | 0.15   | 0.20   | 0.23   | 0.22   | 0.22   | 0.25   | 0.53   | 0.37  |
|               | MD(C)/MD(H) (%) |        | 130    |        | 93     |        | 110    |        | 70    |
| $W_{adh}$     | M (fj)          | 1.77   | 1.16   | 1.76   | 1.82   | 2.68   | 1.37   | 5.05   | 2.19  |
|               | M(C)/M(H) (%)   |        | 65.5   |        | 103    |        | 51.0   |        | 43.3  |
|               | SD (fj)         | 2.15   | 1.90   | 2.10   | 1.97   | 2.73   | 2.40   | 4.89   | 1.42  |
|               | MD (fj)         | 0.91   | 0.40   | 1.32   | 1.26   | 1.54   | 0.65   | 3.48   | 2.00  |
|               | MD(C)/MD(H) (%) |        | 44     |        | 95.3   |        | 42     |        | 57.3  |
| $F_{step}$    | M (pN)          | 32.69  | 45.17  | 44.96  | 54.19  | 54.74  | 58.38  | 72.26  | 57.69 |
|               | M(C)/M(H) (%)   |        | 138.2  |        | 120.5  |        | 106.6  |        | 79.8  |
|               | SD (pN)         | 22.62  | 24.68  | 29.01  | 24.49  | 24.50  | 23.35  | 29.89  | 22.15 |
|               | median (pN)     | 24.12  | 37.73  | 38.30  | 53.80  | 52.35  | 54.30  | 67.70  | 54.70 |
|               | MD(C)/MD(H) (%) |        | 156.4  |        | 140.5  |        | 103.7  |        | 80.80 |
| Slop<br>e     | M (pN/um)       | 38.19  | 36.73  | 36.17  | 57.76  | 52.39  | 46.61  | 30.93  | 59.73 |
|               | M(C)/M(H) (%)   |        | 96.19  |        | 159.7  |        | 88.96  |        | 193.1 |
|               | SD (pN/um)      | 50.25  | 44.16  | 50.95  | 57.67  | 53.08  | 65.92  | 44.41  | 62.18 |
|               | MD (pN/um)      | 16.00  | 20.50  | 12.50  | 30.50  | 35.00  | 22.00  | 14.00  | 29.00 |
|               | MD(C)/MD(H) (%) |        | 128.1  |        | 244.0  |        | 62.86  |        | 207.1 |
| $l_{step}$    | M (um)          | 2.53   | 3.15   | 4.11   | 3.48   | 2.07   | 1.69   | 3.41   | 3.02  |
|               | M(C)/M(H) (%)   |        | 124    |        | 84.7   |        | 82.0   |        | 88.6  |
|               | SD (um)         | 4.07   | 6.68   | 8.94   | 6.58   | 4.23   | 3.55   | 7.73   | 5.21  |
|               | MD (um)         | 0.83   | 0.63   | 1.14   | 1.05   | 1.04   | 0.45   | 0.68   | 1.25  |
|               | MD(C)/MD(H) (%) |        | 76     |        | 92.1   |        | 43.3   |        | 180   |
| $N_{step}$    | M               | 7.05   | 3.97   | 4.76   | 3.93   | 6.00   | 4.83   | 8.38   | 5.19  |
|               | M(C)/M(H) (%)   |        | 56.4   |        | 82.5   |        | 80.4   |        | 61.9  |
|               | SD              | 3.68   | 1.78   | 2.91   | 2.63   | 3.97   | 2.25   | 4.22   | 3.17  |
|               | MD              | 7      | 4      | 4      | 4      | 5      | 4      | 8      | 4     |
|               | MD(C)/MD(H) (%) |        | 60     |        | 100    |        | 80     |        | 50    |
| $l_{pulling}$ | M (um)          | 17.18  | 12.41  | 20.57  | 14.79  | 14.06  | 7.70   | 25.65  | 16.16 |
|               | M(C)/M(H) (%)   |        | 72.26  |        | 71.88  |        | 54.8   |        | 62.98 |
|               | SD (um)         | 14.17  | 14.79  | 18.78  | 12.96  | 12.02  | 9.25   | 17.92  | 10.35 |
|               | MD (um)         | 14.50  | 5.08   | 14.30  | 9.55   | 10.20  | 3.76   | 33.70  | 11.90 |
|               | MD(C)/MD(H) (%) |        | 35.0   |        | 66.80  |        | 36.86  |        | 35.31 |

145

146

147 **Table S2.** Number of F-D curves for step slope analysis  
148

| <b>Number of F-D curve</b> |    |
|----------------------------|----|
| ACH                        | 24 |
| ACC                        | 10 |
| PCH                        | 40 |
| PCC                        | 13 |
| ACCH 90                    | 18 |
| ACCC 90                    | 23 |
| PCCH 90                    | 15 |
| PCCC 90                    | 22 |

149  
150

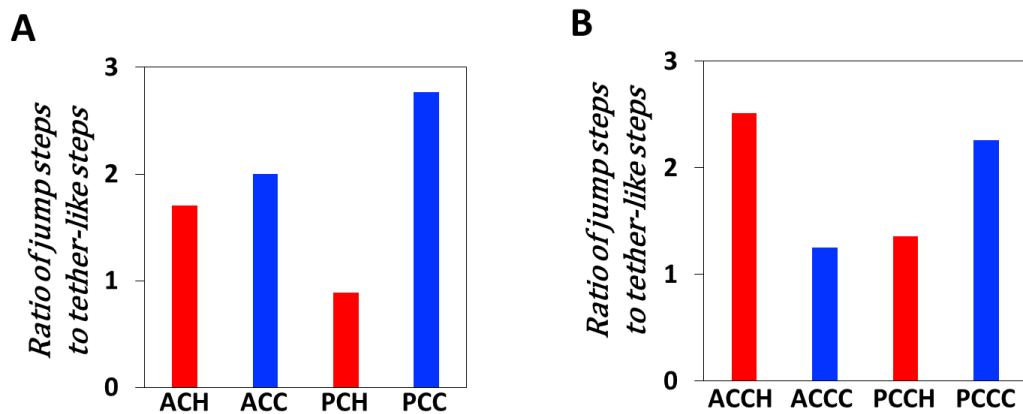

151

152 **Figure S9.** Ratio of jump steps to tether steps of MDCK II cells (A) on gold surfaces and PMS  
 153 and (B) on another MDCK II cell cultured on gold substrates and PMS, all upon temperature  
 154 switch.

155

156

157 **Table S3.** Correlation matrix for number of jump steps and tether steps (\*: p value <0.1, \*\*: p value < 0.05, \*\*\*: p value <0.01; bold: T-test, normal: Wilcoxon Rank Test). The test is  
 158 only applied for the categories at least two conditions are the same.  
 159  
 160

|        | ACH_J  | ACH_T        | ACC_J       | ACC_T               | PCH_J              | PCH_T       | PCC_J       | PCC_T               |
|--------|--------|--------------|-------------|---------------------|--------------------|-------------|-------------|---------------------|
| ACH_J  | -      | 0.017<br>**  | <b>0.74</b> |                     | <b>0.027</b><br>** |             |             |                     |
| ACH_T  | -      | -            |             | <b>0.24</b>         |                    | <b>0.27</b> |             |                     |
| ACC_J  | -      | -            | -           | 0.008<br>***        |                    |             | <b>0.38</b> |                     |
| ACC_T  | -      | -            | -           | -                   |                    |             |             | <b>0.65</b>         |
| PCH_J  | -      | -            | -           | -                   | -                  | <b>0.47</b> | <b>0.41</b> |                     |
| PCH_T  | -      | -            | -           | -                   | -                  | -           | -           | 0.026<br>**         |
| PCC_J  | -      | -            | -           | -                   | -                  | -           | -           | 0.04 **             |
|        | ACCH_J | ACCH_T       | ACCC_J      | ACCC_T              | PCCH_J             | PCCH_T      | PCCC_J      | PCCC_T              |
| ACCH_J | -      | 0.002<br>*** | <b>0.37</b> |                     | <b>0.53</b>        |             |             |                     |
| ACCH_T | -      | -            |             | <b>0.29</b>         |                    | 0.08 *      |             |                     |
| ACCC_J | -      | -            | -           | <b>0.002</b><br>*** |                    |             | 0.68        |                     |
| ACCC_T | -      | -            | -           | -                   |                    |             |             | <b>0.87</b>         |
| PCCH_J | -      | -            | -           | -                   | -                  | 0.6         | <b>0.14</b> |                     |
| PCCH_T | -      | -            | -           | -                   | -                  | -           | -           | <b>0.001</b><br>*** |
| PCCC_J | -      | -            | -           | -                   | -                  | -           | -           | 0.003<br>**         |

161  
 162  
 163

**A**

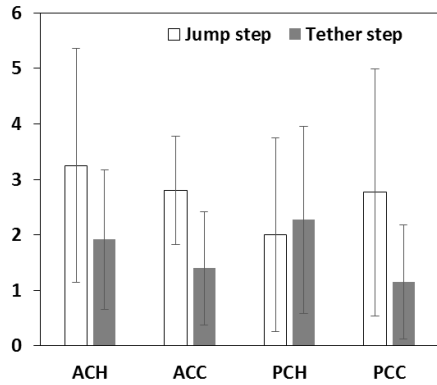

**B**

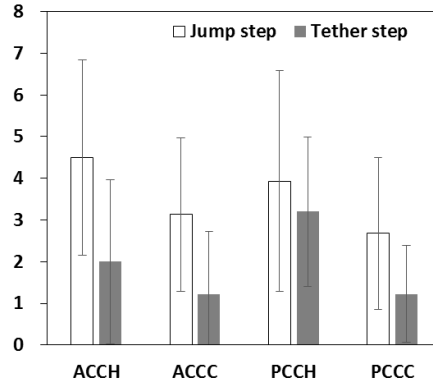

164  
165  
166  
167  
168  
169

**Figure S10.** Average number of jump steps and tether steps of MDCK II cells (A) on gold surfaces and PMS and (B) on another MDCK II cell cultured on gold substrates and PMS, all upon temperature switch.

|             | ACH  | ACC  | PCH  | PCC  | ACCH | ACCC | PCCH | PCCC |
|-------------|------|------|------|------|------|------|------|------|
| Jump step   | 3.25 | 2.80 | 2.00 | 2.77 | 4.50 | 2.81 | 3.93 | 2.68 |
| Tether step | 1.92 | 1.40 | 2.28 | 1.15 | 2.00 | 1.27 | 3.20 | 1.23 |

170  
171  
172  
173  
174

**Table S4.** Average number of jump and tether step in single F-D curve.

175

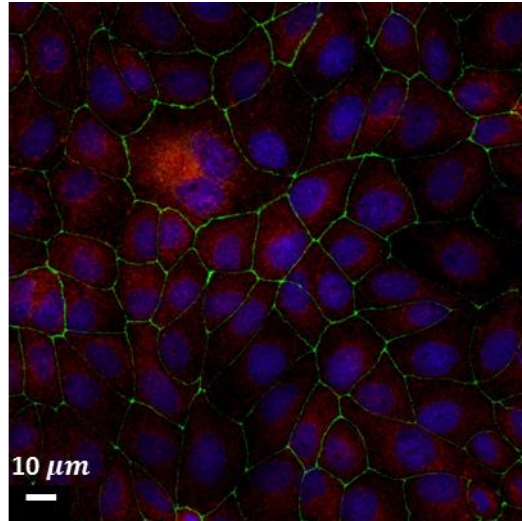

176

177

178 **Figure S11.** Confocal images of MDCK II cell sheet culture on the gold substrate, thereupon

179 fixated and stained for nuclear DNA (blue), ZO-1 (green) and the ECM component fibronectin

180 (Red).

181



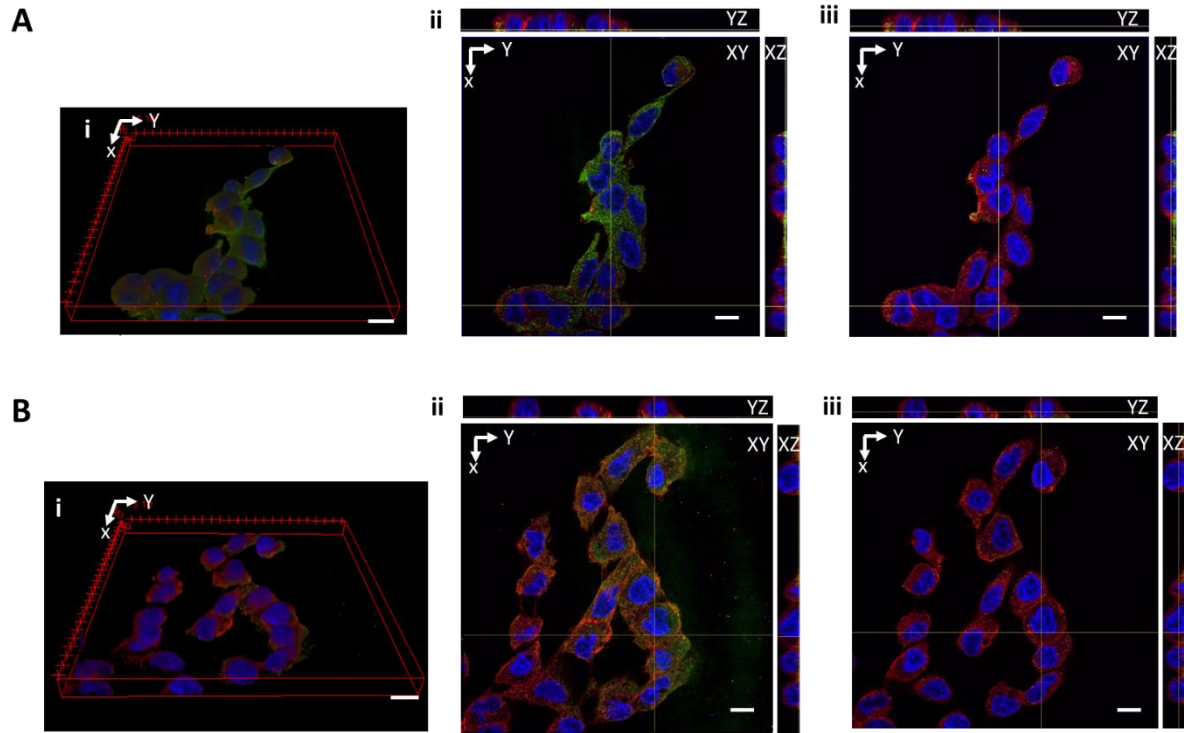

182  
183

184 **Figure S12.** Cell morphology at the early stage (6h) of incubation on **A.** gold substrate and **B.**  
 185 PMS. Confocal images of fixated MDCK II cells stained for nuclear DNA (blue), paxillin  
 186 (green) and E-cadherin (Red) on PMS substrate. i) Merged image of the cells on the substrates  
 187 ii) Paxillin is distributed on the ventral surface of the cells at the surface-proximal focal plane.  
 188 iii) E-cadherin is distributed between individual cells at the focal plane of the apical cell  
 189 membrane height. The cells adhere and spread well to both surfaces, indicating that the PMS  
 190 are adherent at physiological temperature. Scale bar: 10  $\mu\text{m}$ .

191

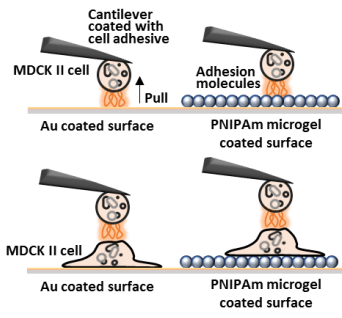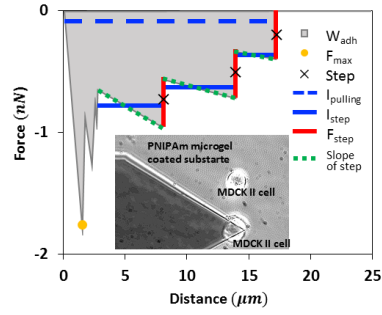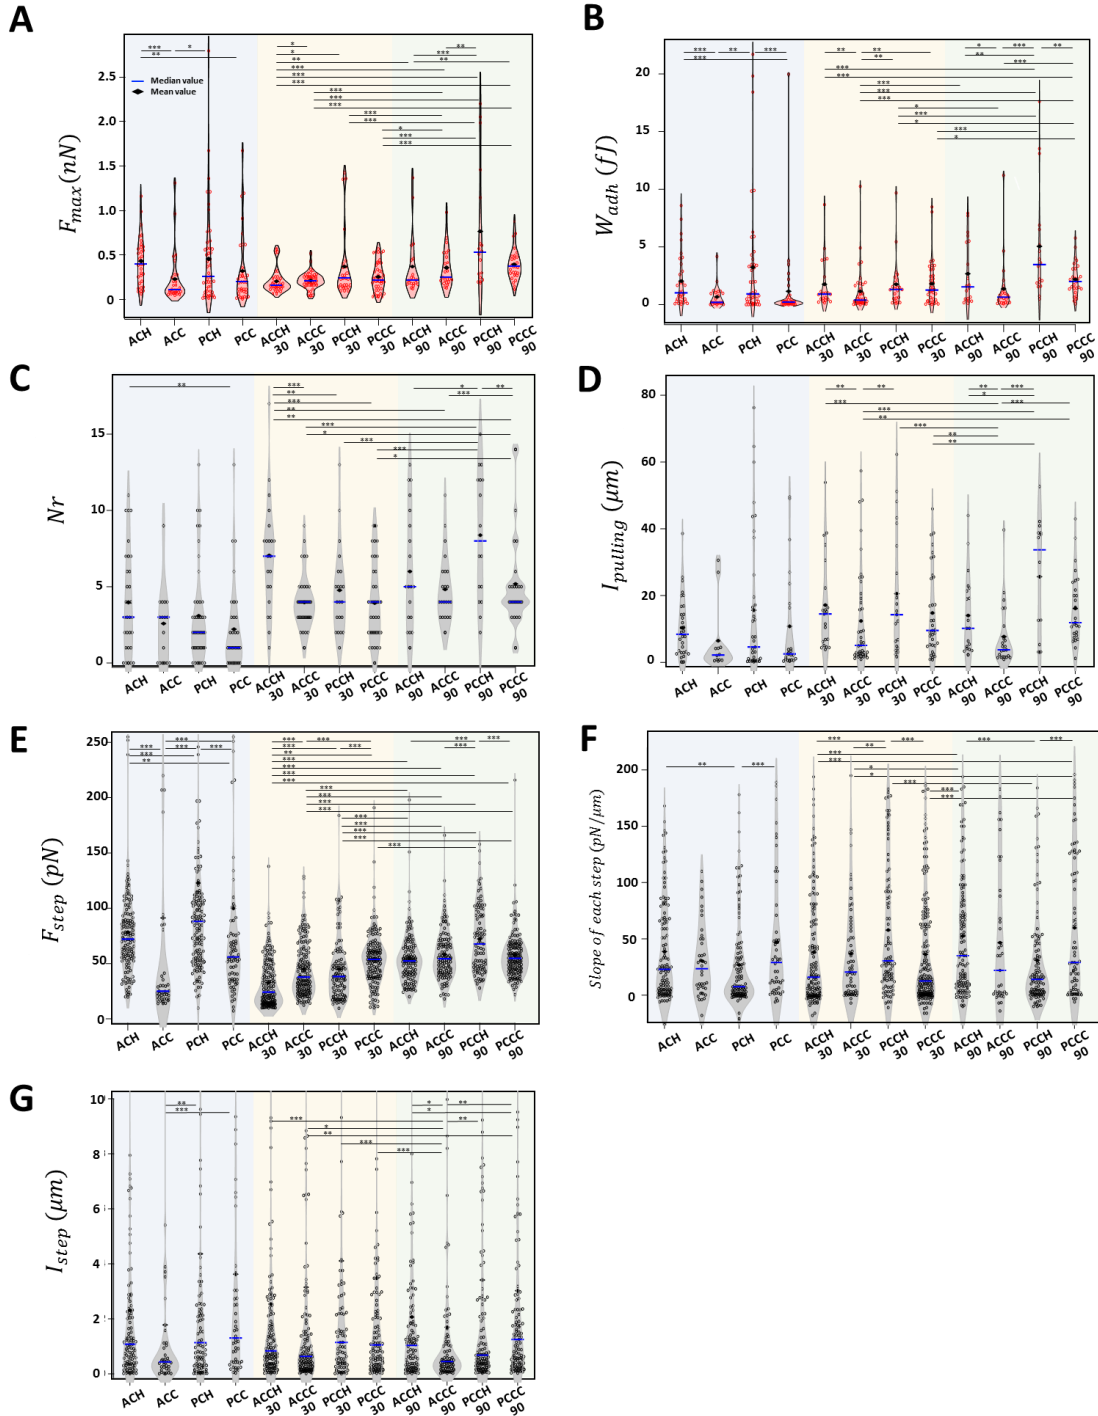

192  
193  
194

**Figure S13.** Results of SCFS with all results of significance tests.

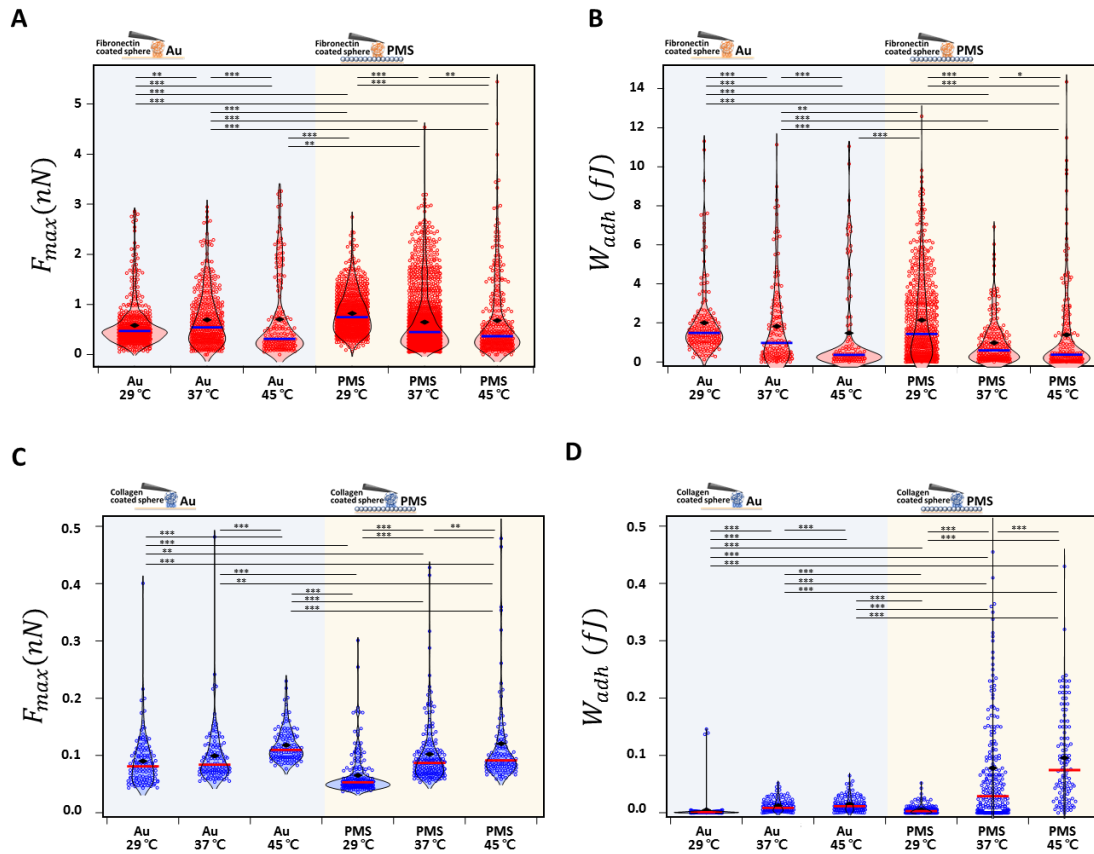

195  
196  
197

**Figure S14.** Interaction between ECM components and gold or PMS upon temperature switching. 45 °C cases are conducted as an additional control. **A.** Maximal adhesion forces  $F_{max}$  and **B.** work of adhesion  $W_{adh}$  of colloidal, fibronectin coated AFM cantilever to the gold substrate and PMS. **C.** Maximal adhesion forces  $F_{max}$  and **D.** work of adhesions  $W_{adh}$  colloidal, collagen coated AFM cantilever to the gold substrate and PMS upon temperature switching. (—: median value; ◆: mean value)

202  
203

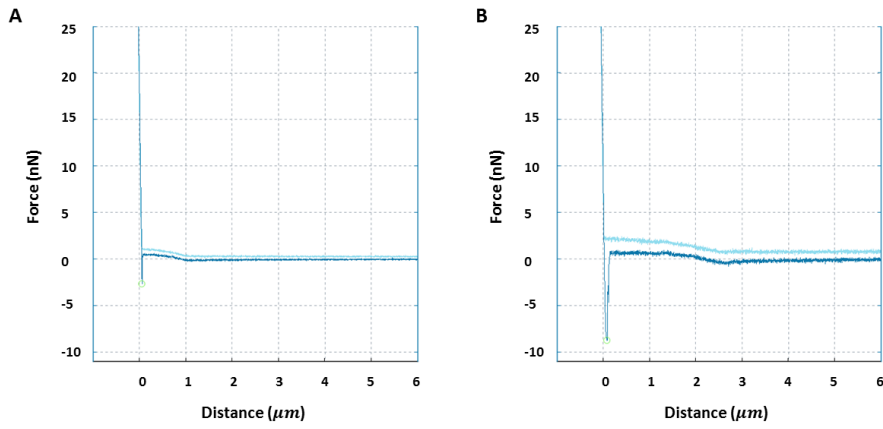

204  
205  
206

**Figure S15.** F-D curves for the A. Poly-L-Lysin and B. CellTak functionalized cantilevers.

207  
208  
209

**Table S5. Correlation matrix**

(\*: p value <0.1, \*\*: p value < 0.05, \*\*\*: p value <0.01; bold: T-test, normal: Wilcoxon Rank Test)

|               |                    | ACH    | ACC                    | PCH                | PCC               |                |               |                 |                 |
|---------------|--------------------|--------|------------------------|--------------------|-------------------|----------------|---------------|-----------------|-----------------|
| <b>ACH</b>    | F <sub>max</sub>   | -      | <b>0.007 (***)</b>     | 0.137              | 0.011 (**)        |                |               |                 |                 |
|               | W <sub>adh</sub>   | -      | 0.008 (***)            | 0.864              | 1.69e-04 (***)    |                |               |                 |                 |
|               | Nr                 | -      | <b>0.12</b>            | <b>0.255</b>       | <b>0.028 (**)</b> |                |               |                 |                 |
|               | Slope of each step | -      | 0.646                  | 0.014 (**)         | 0.484             |                |               |                 |                 |
|               | F <sub>step</sub>  | -      | <b>4.256e-06 (***)</b> | 9.998e-03 (***)    | 0.03 (**)         |                |               |                 |                 |
|               | IP                 | -      | <b>0.28</b>            | 0.632              | 0.168             |                |               |                 |                 |
|               | I <sub>step</sub>  | -      | 0.491                  | 0.542              | 0.23              |                |               |                 |                 |
| <b>ACC</b>    | F <sub>max</sub>   | -      | -                      | 0.083 (*)          | 0.52              |                |               |                 |                 |
|               | W <sub>adh</sub>   | -      | -                      | 0.039 (**)         | 0.4622            |                |               |                 |                 |
|               | Nr                 | -      | -                      | <b>0.526</b>       | <b>0.656</b>      |                |               |                 |                 |
|               | Slope of each step | -      | -                      | 0.134              | 0.304             |                |               |                 |                 |
|               | F <sub>step</sub>  | -      | -                      | 1.2e-07 (***)      | 4.86e-04 (***)    |                |               |                 |                 |
|               | IP                 | -      | -                      | 0.448              | 0.692             |                |               |                 |                 |
|               | I <sub>step</sub>  | -      | -                      | 0.011 (**)         | 0.004 (***)       |                |               |                 |                 |
| <b>PCH</b>    | F <sub>max</sub>   | -      | -                      | -                  | 0.215             |                |               |                 |                 |
|               | W <sub>adh</sub>   | -      | -                      | -                  | 0.003 (***)       |                |               |                 |                 |
|               | Nr                 | -      | -                      | -                  | <b>0.211</b>      |                |               |                 |                 |
|               | Slope of each step | -      | -                      | -                  | 0.009 (***)       |                |               |                 |                 |
|               | F <sub>step</sub>  | -      | -                      | -                  | 3.8e-04 (***)     |                |               |                 |                 |
|               | IP                 | -      | -                      | -                  | 0.844             |                |               |                 |                 |
|               | I <sub>step</sub>  | -      | -                      | -                  | 0.604             |                |               |                 |                 |
| <b>PCC</b>    | F <sub>max</sub>   | -      | -                      | -                  | -                 |                |               |                 |                 |
|               | W <sub>adh</sub>   | -      | -                      | -                  | -                 |                |               |                 |                 |
|               | Nr                 | -      | -                      | -                  | -                 |                |               |                 |                 |
|               | Slope of each step | -      | -                      | -                  | -                 |                |               |                 |                 |
|               | F <sub>step</sub>  | -      | -                      | -                  | -                 |                |               |                 |                 |
|               | IP                 | -      | -                      | -                  | -                 |                |               |                 |                 |
|               | I <sub>step</sub>  | -      | -                      | -                  | -                 |                |               |                 |                 |
|               |                    | ACCH30 | ACCC30                 | PCCH30             | PCCC30            | ACCH90         | ACCC90        | PCCH90          | PCCC90          |
| <b>ACCH30</b> | F <sub>max</sub>   | -      | 0.092 (*)              | 0.068 (*)          | 0.154             | 0.01 (**)      | 5.0e-04 (***) | 1.32e-06 (***)  | 2.42e-06 (***)  |
|               | W <sub>adh</sub>   | -      | 0.037 (**)             | 0.633              | 0.892             | 0.352          | 0.171         | 0.002 (***)     | 0.049 (***)     |
|               | Nr                 | -      | 3.22e-04 (***)         | 0.021 (**)         | 8.0e-04 (***)     | 0.363          | 0.022 (**)    | 0.344           | 0.032 (**)      |
|               | Slope of each step | -      | <b>0.839</b>           | <b>0.009 (***)</b> | <b>0.725</b>      | 0.006 (***)    | 0.696         | 0.66            | 0.005 (***)     |
|               | F <sub>step</sub>  | -      | 9.422e-08 (***)        | 2.76e-05 (***)     | 7.76e-16 (***)    | 3.33e-16 (***) | 0 (***)       | 0 (***)         | 0 (***)         |
|               | IP                 | -      | 0.022 (**)             | 0.95               | 0.5               | 0.344          | 2.0e-04 (***) | 0.316           | 0.694           |
|               | I <sub>step</sub>  | -      | 0.206                  | 0.614              | 0.638             | 0.432          | 0.003 (***)   | 0.46            | 0.404           |
| <b>ACCC30</b> | F <sub>max</sub>   | -      | -                      | 0.368              | 0.373             | 0.184          | 0.009 (***)   | 6.21e-06 (***)  | 1.79e-07 (***)  |
|               | W <sub>adh</sub>   | -      | -                      | 0.03 (**)          | 0.041 (**)        | 0.009 (***)    | 0.679         | 7.958e-07 (***) | 9.744e-05 (***) |
|               | Nr                 | -      | -                      | 0.405              | 0.516             | 0.103          | 0.149         | 1.58e-04 (***)  | 0.067 (*)       |
|               | Slope of each step | -      | -                      | 0.022 (**)         | 0.334             | 0.051 (*)      | 0.946         | 0.244           | 0.067 (*)       |

|               |                    |   |   |            |                 |                 |                 |                 |                 |
|---------------|--------------------|---|---|------------|-----------------|-----------------|-----------------|-----------------|-----------------|
|               | F <sub>step</sub>  | - | - | 0.578      | 1.132e-04 (***) | 5.196e-05 (***) | 5.226e-07 (***) | 3.64e-13 (***)  | 2.598e-08 (***) |
|               | IP                 | - | - | 0.027 (**) | 0.146           | 0.108           | 0.248           | 0.005 (***)     | 0.012 (**)      |
|               | I <sub>step</sub>  | - | - | 0.17       | 0.118           | 0.774           | 0.091 (*)       | 0.584           | 0.048 (**)      |
| <b>PCCH30</b> | F <sub>max</sub>   | - | - | -          | 0.715           | 0.522           | 0.212           | 0.002 (***)     | 0.009 (***)     |
|               | W <sub>adh</sub>   | - | - | -          | 0.958           | 0.492           | 0.089 (*)       | 8.52e-04 (***)  | 0.055 (*)       |
|               | Nr                 | - | - | -          | 0.256           | 0.442           | 0.706           | 0.009 (***)     | 0.653           |
|               | Slope of each step | - | - | -          | 1.22e-04 (***)  | 0.474           | 0.114           | 1.08e-04 (***)  | 0.792           |
|               | F <sub>step</sub>  | - | - | -          | 5.72e-05 (***)  | 2.229e-05 (***) | 3.66e-07 (***)  | 1.31e-13 (***)  | 2.87e-08 (***)  |
|               | IP                 | - | - | -          | 0.316           | 0.392           | 0.003 (***)     | 0.538           | 0.974           |
|               | I <sub>step</sub>  | - | - | -          | 0.958           | 0.262           | 0.007 (***)     | 0.366           | 0.756           |
| <b>PCCC30</b> | F <sub>max</sub>   | - | - | -          | -               | 0.432           | 0.083 (*)       | 3.0e-04 (***)   | 0.002 (***)     |
|               | W <sub>adh</sub>   | - | - | -          | -               | 0.343           | 0.127           | 7.9e-04 (***)   | 0.082 (*)       |
|               | Nr                 | - | - | -          | -               | 0.054 (*)       | 0.101           | 1.845e-04 (***) | 0.067 (*)       |
|               | Slope of each step | - | - | -          | -               | 8.2e-04 (***)   | 0.678           | 0.862           | 0.002 (***)     |
|               | F <sub>step</sub>  | - | - | -          | -               | 0.76            | 0.2             | 1.86e-05 (***)  | 0.268           |
|               | IP                 | - | - | -          | -               | 0.95            | 0.012 (**)      | 0.04 (**)       | 0.318           |
|               | I <sub>step</sub>  | - | - | -          | -               | 0.26            | 0.002 (***)     | 0.348           | 0.684           |
| <b>ACCH90</b> | F <sub>max</sub>   | - | - | -          | -               | -               | 0.364           | 0.007 (***)     | 0.046 (**)      |
|               | W <sub>adh</sub>   | - | - | -          | -               | -               | 0.051 (*)       | 0.0493 (**)     | 0.749           |
|               | Nr                 | - | - | -          | -               | -               | 0.542           | 0.087 (*)       | 0.635           |
|               | Slope of each step | - | - | -          | -               | -               | 0.17            | 4.0e-04 (***)   | 0.744           |
|               | F <sub>step</sub>  | - | - | -          | -               | -               | 0.138           | 1.208e-05 (***) | 0.106           |
|               | IP                 | - | - | -          | -               | -               | 0.017 (**)      | 0.09 (*)        | 0.226           |
|               | I <sub>step</sub>  | - | - | -          | -               | -               | 0.0578 (*)      | 0.794           | 0.092 (*)       |
| <b>ACCC90</b> | F <sub>max</sub>   | - | - | -          | -               | -               | -               | 0.036 (**)      | 0.27            |
|               | W <sub>adh</sub>   | - | - | -          | -               | -               | -               | 3.55e-05 (***)  | 0.001 (***)     |
|               | Nr                 | - | - | -          | -               | -               | -               | 0.007 (***)     | 0.828           |
|               | Slope of each step | - | - | -          | -               | -               | -               | 0.6             | 0.171           |
|               | F <sub>step</sub>  | - | - | -          | -               | -               | -               | 0.001 (***)     | 0.893           |
|               | IP                 | - | - | -          | -               | -               | -               | 0.002 (***)     | 2.4e-04 (***)   |
|               | I <sub>step</sub>  | - | - | -          | -               | -               | -               | 0.038 (**)      | 3.16e-04 (***)  |
| <b>PCCH90</b> | F <sub>max</sub>   | - | - | -          | -               | -               | -               | -               | 0.175           |
|               | W <sub>adh</sub>   | - | - | -          | -               | -               | -               | -               | 0.025 (**)      |
|               | Nr                 | - | - | -          | -               | -               | -               | -               | 0.018 (**)      |
|               | Slope of each step | - | - | -          | -               | -               | -               | -               | 2.0e-04 (***)   |
|               | F <sub>step</sub>  | - | - | -          | -               | -               | -               | -               | 4.0e-04 (***)   |
|               | IP                 | - | - | -          | -               | -               | -               | -               | 0.162           |

|                  |                    |                 |                 |                   |                    |                   |                   |                    |       |
|------------------|--------------------|-----------------|-----------------|-------------------|--------------------|-------------------|-------------------|--------------------|-------|
|                  | $I_{step}$         | -               | -               | -                 | -                  | -                 | -                 | -                  | 0.172 |
| <b>PCCC90</b>    | $F_{max}$          | -               | -               | -                 | -                  | -                 | -                 | -                  | -     |
|                  | $W_{adh}$          | -               | -               | -                 | -                  | -                 | -                 | -                  | -     |
|                  | Nr                 | -               | -               | -                 | -                  | -                 | -                 | -                  | -     |
|                  | Slope of each step | -               | -               | -                 | -                  | -                 | -                 | -                  | -     |
|                  | $F_{step}$         | -               | -               | -                 | -                  | -                 | -                 | -                  | -     |
|                  | IP                 | -               | -               | -                 | -                  | -                 | -                 | -                  | -     |
|                  | $I_{step}$         | -               | -               | -                 | -                  | -                 | -                 | -                  | -     |
|                  |                    | <b>Au 29 °C</b> | <b>Au 37 °C</b> | <b>Au 45 °C</b>   | <b>PMS 29 °C</b>   | <b>PMS 37 °C</b>  | <b>PMS 45 °C</b>  |                    |       |
| <b>Au 29 °C</b>  | Fibronectin        | $F_{max}$       | -               | 0.016<br>(**)     | 0.001<br>(***)     | 0<br>(***)        | 0.318             | 0.001<br>(***)     |       |
|                  |                    | $W_{adh}$       | -               | 4.72E-04<br>(***) | 2.06E-14<br>(***)  | 0.24              | 0<br>(***)        | 4.44E-16<br>(***)  |       |
|                  | Collagen           | $F_{max}$       | -               | <b>0.133</b>      | 1.754E-14<br>(***) | 2.22E-15<br>(***) | 0.015<br>(**)     | 7.10E-05<br>(***)  |       |
|                  |                    | $W_{adh}$       | -               | 0<br>(***)        | 0<br>(***)         | 0.001<br>(***)    | 4E-13<br>(***)    | 0<br>(***)         |       |
| <b>Au 37 °C</b>  | Fibronectin        | $F_{max}$       | -               | -                 | 0.001<br>(***)     | 2.2E-14<br>(***)  | 0.005<br>(**)     | 2.20E-04<br>(***)  |       |
|                  |                    | $W_{adh}$       | -               | -                 | 3.6E-4<br>(***)    | 0.019<br>(**)     | 9.38E-05<br>(***) | 1.10E-05<br>(***)  |       |
|                  | Collagen           | $F_{max}$       | -               | -                 | 7.74E-11<br>(***)  | 0<br>(***)        | 0.96              | 0.017<br>(**)      |       |
|                  |                    | $W_{adh}$       | -               | -                 | 0.177              | 1.31E-14<br>(***) | 2.06E-05<br>(***) | 0<br>(***)         |       |
| <b>Au 45 °C</b>  | Fibronectin        | $F_{max}$       | -               | -                 | -                  | 0<br>(***)        | 0.02<br>(**)      | 0.68               |       |
|                  |                    | $W_{adh}$       | -               | -                 | -                  | 7.54E-09<br>(***) | 0.252             | 0.456              |       |
|                  | Collagen           | $F_{max}$       | -               | -                 | -                  | 0<br>(***)        | 3.34E-13<br>(***) | 3.62E-07<br>(***)  |       |
|                  |                    | $W_{adh}$       | -               | -                 | -                  | 0<br>(***)        | 2E-4<br>(***)     | 0<br>(***)         |       |
| <b>PMS 29 °C</b> | Fibronectin        | $F_{max}$       | -               | -                 | -                  | -                 | 0<br>(***)        | 0<br>(***)         |       |
|                  |                    | $W_{adh}$       | -               | -                 | -                  | -                 | 4.44E-16<br>(***) | 2.264E-14<br>(***) |       |
|                  | Collagen           | $F_{max}$       | -               | -                 | -                  | -                 | 0<br>(***)        | 0<br>(***)         |       |
|                  |                    | $W_{adh}$       | -               | -                 | -                  | -                 | 0<br>(***)        | 0<br>(***)         |       |
| <b>PMS 37 °C</b> | Fibronectin        | $F_{max}$       | -               | -                 | -                  | -                 | -                 | 0.016<br>(**)      |       |
|                  |                    | $W_{adh}$       | -               | -                 | -                  | -                 | -                 | 0.084<br>(*)       |       |
|                  | Collagen           | $F_{max}$       | -               | -                 | -                  | -                 | -                 | 0.014<br>(**)      |       |
|                  |                    | $W_{adh}$       | -               | -                 | -                  | -                 | -                 | 3.22E-07<br>(***)  |       |
| <b>PMS 45 °C</b> | Fibronectin        | $F_{max}$       | -               | -                 | -                  | -                 | -                 | -                  |       |
|                  |                    | $W_{adh}$       | -               | -                 | -                  | -                 | -                 | -                  |       |
|                  | Collagen           | $F_{max}$       | -               | -                 | -                  | -                 | -                 | -                  |       |
|                  |                    | $W_{adh}$       | -               | -                 | -                  | -                 | -                 | -                  |       |

210

211

212 **Table S6** Number of measurement information of SCFS and CP-AFM

|             | Measurement days | Number of cells       | Number of force curves |     |
|-------------|------------------|-----------------------|------------------------|-----|
| ACH 30      | 5                | 12                    | 32                     |     |
| ACC 30      | 3                | 7                     | 24                     |     |
| PCH 30      | 5                | 9                     | 49                     |     |
| PCC 30      | 5                | 7                     | 32                     |     |
| ACCH 30     | 3                | 7                     | 36                     |     |
| ACCC 30     | 3                | 13                    | 50                     |     |
| PCCH 30     | 4                | 9                     | 26                     |     |
| PCCC 30     | 3                | 13                    | 42                     |     |
| ACCH 90     | 3                | 8                     | 20                     |     |
| ACCC 90     | 2                | 11                    | 23                     |     |
| PCCH 90     | 3                | 8                     | 17                     |     |
| PCCC 90     | 2                | 11                    | 28                     |     |
| ECM         | Substrate        | Number of force curve |                        |     |
| Fibronectin | Au               | 29 °C                 | 551                    |     |
|             |                  | 37°C                  | 448                    |     |
|             |                  | 45°C                  | 188                    |     |
|             | PMS              | 29°C                  | 818                    |     |
|             |                  | 37°C                  | 1628                   |     |
|             |                  | 45°C                  | 352                    |     |
|             | Collagen I       | Au                    | 29 °C                  | 124 |
|             |                  |                       | 37°C                   | 129 |
|             |                  |                       | 45°C                   | 126 |
| PMS         |                  | 29°C                  | 195                    |     |
|             |                  | 37°C                  | 190                    |     |
|             |                  | 45°C                  | 127                    |     |

213
